# Early life factors influencing hand preference in the UK biobank cohort

Carolien G.F. de Kovel<sup>a</sup>, Amaia Carrión Castillo<sup>a</sup>, Clyde Francks<sup>a,b</sup>

<sup>a</sup> Department of Language and Genetics, Max Planck Institute for Psycholinguistics, Nijmegen, the Netherlands

<sup>b</sup> Donders Institute for Brain, Cognition and Behaviour, Radboud University Nijmegen, Nijmegen, The Netherlands

Corresponding author: Clyde Francks, Max Planck Institute for Psycholinguistics, Wundtlaan 1, Nijmegen 6525XD, The Netherlands. Email: [clyde.francks@mpi.nl](mailto:clyde.francks@mpi.nl)

Running Title: Handedness and early life factors in the UK Biobank

Keywords: Handedness, perinatal, postnatal, early life factors, birthweight

## Abstract

Hand preference is a conspicuous variation in human behaviour, with a worldwide proportion of around 90% of people preferring to use the right hand for many tasks, and 10% the left hand. As the developmental foundations of hand preference occur *in utero*, with further establishment within the first two years of life, prenatal and early-life factors are likely to play a role. Various, often related, factors have been studied in the past, but often in small samples, or samples with biased selection schemes. We used the large, general population cohort of the UK biobank (~500,000 participants) to study possible relations between early life factors and adult hand preference. The probability of being left-handed was affected by the year and location of birth, birthweight, being part of a multiple birth, season of birth, breastfeeding, as well as sex, with each effect remaining significant after accounting for all others. Maternal smoking showed no association with handedness. Analysis of genome-wide polymorphism data indicated a tentative genetic correlation between handedness and birth-weight, which was opposite to their overall phenotypic correlation. However, the total effect on handedness of all these factors was very small. Therefore other, unknown effects must be involved, including possible environmental factors, and/or random developmental variation with respect to the left-right formation of the embryonic brain.

## Introduction

Roughly 90% of people have a preference for using the right hand for complex manual tasks (Gilbert and Wysocki, 1992; Kushner, 2013; Peters et al., 2006). A minority of roughly 10% prefer to use the left hand, and a smaller group of roughly 1% has no clear preference, the so-called 'ambidextrous' people. As a striking human behavioural polymorphism, handedness has attracted a lot of attention in both the scientific and popular literature. For example, personality traits and cognitive skills have been claimed to associate with handedness (Peterson and Lansky, 1977; Sartarelli, 2016). The prevalence of non-right-handedness has also been found to be increased in people with various cognitive or psychiatric disorders (Deep-Soboslay et al., 2010; Markou et al., 2017).

Hand preference becomes established within the first two years of life, but prenatal observations using ultrasound scanning have indicated an earlier initiation of the trait (Hepper, 2013; Hepper et al., 1991). Gene expression analysis has revealed left-right differences in the human central nervous system as early as four weeks post conception (de Kovel et al., 2017), which indicates that laterality is an innate and pervasive property of the brain. The strong skew towards right-handedness at the population level suggests that right-hand-preference is the typical or default arrangement for humans, while left-handedness may result from genetic, environmental or random perturbations that influence the central nervous system during early development (although alternatives to this view have been discussed (Nicholls et al., 2012; Searleman et al., 1989)).

One biological effect on handedness is known to be sex, with males more likely to be left-handed than females (Gilbert and Wysocki, 1992; Papadatou-Pastou et al., 2008). For example, in a U.S. dataset aged 10-86 years, the proportion of non-right-handers among 664,114 women was 9.9%, versus 12.6% among 513,393 men (Gilbert and Wysocki, 1992). Previous studies have also shown that genetic variation contributes modestly to left-handedness, with heritability estimates ranging from 0.03 for SNP-based heritability in the UK Biobank ( $N > 500,000$ ) (Ge et al., 2017), to 0.25 in twin studies (Medland et al., 2009; Suzuki and Ando, 2014), and even  $> 0.5$  in small family studies (Lien et al., 2015; Warren et al., 2006). A number of candidate genes or genetic pathways have been proposed to be involved with varying degrees of statistical genetic support (Francks, 2015; Neale, 2017b; Ocklenburg et al., 2013; Scerri et al., 2011), but no genetic mechanisms or biological processes have yet been implicated unambiguously. In addition, no clear markers of brain anatomical asymmetry have been found to associate with handedness (Guadalupe et al., 2014).

One of the problems with assessing handedness is that, historically, people who are not right-handed have often been made to use their right hand for writing, handling cutlery, and various occupational tasks (Galobardes et al., 1999; Gilbert and Wysocki, 1992). As a consequence, a proportion of otherwise left-handed or ambidextrous people has become right-handed, while possibly also a number of left-handed people have become ambidextrous through this enforcing (Vuoksima et al., 2009). The rate of enforced right-handedness varies between cultures (Raymond and Pontier, 2004), but has typically shown a decline over recent decades: in many countries, proportions of left-handers have increased with time, probably because society has become more tolerant of variation (Cerhan et al., 1994; Gilbert and Wysocki, 1992; Salive et al., 1993).

Among the early life factors that have been studied for associations with hand preference are the month of birth (Abel and Kruger, 2004; Martin and Jones, 1999; Rogerson, 1994), being part of a multiple birth (Davis and Annett, 1994; Ellis et al., 1988; Heikkila et al., 2015), birthweight (Hay and Howie, 1980; Medland et al., 2009; Searleman et al., 1989), breastfeeding (Denny, 2012), and maternal smoking (Dragovic et al., 2013; Olsen, 1995). While small effects of birthweight and multiple birth seem generally consistent throughout the literature (lower birthweight and twinning

associated with non-right handedness), other effects remain equivocal. For example, previous studies have sometimes not taken the sex or age of participants into account, or have not accounted for the country of origin, so that the analyses may have been partly confounded. Other studies have only considered university students or other convenient sampling selections, which may have resulted in an incomplete picture.

A very large, and well characterised, population-based cohort such as the UK Biobank, allows multiple potential factors to be considered together, while providing statistical power to begin to disentangle them. In this study, we analysed a number of early life factors that might influence adult hand preference in the UK Biobank dataset. In addition, as genome-wide association data are available for this cohort, we were able to assess the genetic correlations between handedness and these other factors, some of which are heritable in their own right. Genetic correlation is a measure of the extent to which the same genetic variation, over the entire genome, affects two traits.

## Methods

Data were obtained from the UK Biobank cohort, as part of research application 16066, with Clyde Francks as the principal applicant. The data collection in the UK Biobank, including the consent procedure, has been described elsewhere (Sudlow et al., 2015). Informed consent was obtained by the UK Biobank for all participants. For this study of early life factors we used measurements taken during the first visit, i.e. variables identified in the database by 0.0. In total, data were available for 501,730 individuals (Table 1). To avoid using non-independent data, we excluded randomly one individual from each pair of participants whose genetic relatedness was inferred to be 3rd degree or closer, on the basis of genotype data at single nucleotide polymorphisms (SNPs) spanning the genome, as previously calculated by Bycroft et al. (Bycroft et al., 2017). This left 421,776 individuals, for whom demographic information (year of birth and sex) is illustrated in Figure S1, although further drop-out then varied according to the exact variable considered (see Tables 3 and 4; for example, information on birthweight was available for 62% of the females and 47% of the males).

The distribution of answers to the hand preference question is shown in Table 1.

*Table 1 Distribution of responses to question about handedness*

| <b>Hand use</b>                       | <b>Males</b>    | <b>Females</b>  | <b>Total</b>   |
|---------------------------------------|-----------------|-----------------|----------------|
| Right-handed                          | 199,915 (87.4%) | 246,021 (90.1%) | 445,936 (89%)  |
| Left-handed                           | 23,792 (10.4%)  | 23,059 (8.4%)   | 46,851 (9.3%)  |
| Use both right and left hands equally | 4,847 (2.1%)    | 3,813 (1.4%)    | 8,660 (1.7%)   |
| Prefer not to answer                  | 169 (0.007%)    | 114 (0.004%)    | 283 (0.005%)   |
| <b>TOTAL</b>                          | <b>228,723</b>  | <b>273,107</b>  | <b>501,730</b> |

For a subset of 9,856 participants, answers to the question about hand preference were available for both the initial (0.0) and the second follow-up visit (2.0). We compared these answers for consistency. While right-handed and left-handed persons were mostly consistent (only 0.7% and 2.6% changed their answer respectively), out of 156 people who had initially answered "use both right and left hands equally", 64 (41%) gave a different answer during follow-up. We therefore excluded all people who answered "use both right and left hands equally" at their first visit from further analyses, as well as the small number of people who had ticked 'Prefer not to answer' (Table 1). Thus the contrasts reported here are between people who answered left-handed and right-handed at their first visit.

A number of early life variables were available in the UK biobank data. Table 2 shows the measures that were available. As the degree of cultural enforcing of right-hand use is known to have varied by year and country (see Introduction), we also included country of birth and year of birth as variables. Finally, we included sex. All variables were self-reported, except sex and date of birth (see UK Biobank Showcase; <http://www.ukbiobank.ac.uk/>), although sex information could be updated by the participants.

Table 2 Variables included in the analysis. See table 3a for sample sizes.

| Description                   | header      | Type                 | Note                                                |
|-------------------------------|-------------|----------------------|-----------------------------------------------------|
| Country of birth              | f.1647.0.0  | categorical          | 4 UK countries, Republic of Ireland, Elsewhere      |
| Breastfed as a baby           | f.1677.0.0  | categorical          | 1=Yes,0=no, -1=do not know, -3=prefer not to answer |
| Part of a multiple birth      | f.1777.0.0  | categorical          | 1=Yes,0=no, -1=do not know, -3=prefer not to answer |
| Maternal smoking around birth | f.1787.0.0  | categorical          | 1=Yes,0=no, -1=do not know, -3=prefer not to answer |
| Birthweight                   | f.20022.0.0 | continuous           | (kg)                                                |
| Sex                           | f.31.0.0    | categorical          | 0=Female,1=Male                                     |
| Year of birth                 | f.34.0.0    | continuous (integer) | between 1934 and 1971                               |
| Month of birth                | f.52.0.0    | continuous*          | 12 months                                           |

\* transformed before analysis, see main text

The entries “do not know” and “prefer not to answer” for all variables were treated as missing values.

As months of the year are not independent categories (neighbouring months are more similar to each other with respect to e.g. temperature and day length), one approach is to model the effects of season as a waveform function of the month (Lyll et al., 2018). We followed this approach and tested:

$$\text{Cos}(2\pi(t_i-1)/12)$$

where  $t_i$  is an integer from 1 to 12 representing the month of birth. This cosine function has extremes in summer and winter.

We excluded individuals with birthweight heavier than 6.0 kg to avoid outlier effects.

### *Statistical analysis*

All statistical analyses were performed with Rstudio, using R version 3.4.0.

#### *Univariable analysis of categorical predictors of handedness*

Associations between handedness and each of the categorical variables (country of birth, breastfed, multiple birth, maternal smoking, sex) were investigated with chi-square tests of independence.

#### *Univariable analysis of continuous predictors of handedness*

For testing univariable associations between handedness and continuous variables (birthweight, year of birth and cosine of month), logistic regression was used. In addition, univariable effects on proportions of left-handed people were visualised to assess whether non-linear relations were

playing a role (Figures S2, S3). A model including either birthweight squared, or year of birth squared (as orthogonal vectors created by R function `poly()` from the 'stats' package), was compared to the corresponding model with the single variable to establish whether the squared predictor made a significant additional contribution.

The above analyses of handedness were also carried out separately within the two sexes.

#### *Multivariable analysis of handedness predictors*

All predictor variables having shown nominally significant ( $p < 0.05$ ) effects on handedness in univariable testing (i.e. all but maternal smoking) were then included in multivariable analysis. For this, `glm` (general linear model) was used in R v3.4.0, for the binomial family of models, with right-handed/left-handed as the dependent variable. Participants with missing values for any of the predictor variables were excluded. The threshold for significance in the multivariable model was set at 0.05, i.e. testing whether each variable made a contribution beyond the combined effects of all others, in simultaneous entry. Collinearity was checked with the VIF (Variance Inflation Factor) function in R. Model fit was estimated with the Hosmer-Lemeshow test, using 15 quantiles, while the log likelihood of the full model vs the null model (with no predictors for handedness) was also estimated. In addition, the McFadden pseudo  $R^2$  was computed.

In the multivariable model, 219,994 participants without missing values were included: 83,506 males and 136,488 females. Multivariable analysis was also repeated for males and females separately.

#### *Further statistical analysis*

As mentioned in the introduction, some of the predictor variables were themselves expected to be associated with each other. We investigated the pairwise relations between predictor variables as follows: For categorical pairs of variables the Chi square test was used to calculate Cramer's V (i.e. a statistic scaled from 0 to 1 as an indication of the degree of non-independence). The R command `assocstats` was used for these calculations. For continuous pairs of variables the Pearson correlation coefficient R was calculated. When one of a pair of variables was dichotomous and the other continuous, Spearman's rho was calculated. For Country of Birth in relation to continuous variables, ANOVA was used in which the adjusted R was calculated.

#### *Genetic analysis*

SNP-based heritability is a measure ranging from 0 to 1 which indicates the extent to which variation in a trait is influenced by the combined effects of variation at SNPs distributed over the genome (Vinkhuyzen et al., 2013). Handedness, birthweight, and being breastfed were previously reported to have low but significant SNP-based heritabilities in the UK biobank dataset (handedness 1.8% ( $se=0.00737$ ), birthweight: 12% ( $se=0.006$ ); breastfed: 4.5% ( $se=0.00674$ )) (Neale, 2017a). Because we found that the latter two variables were associated with handedness in the present study (see below), we re-calculated their SNP-based heritabilities and then measured their genetic correlations with handedness, which had not been investigated before. Genetic correlation analysis measures the extent to which variability in a pair of traits is influenced by the same genetic variations over the genome.

For this purpose, in addition to removing one from each pair of related subjects (see above), participants were excluded when there was a mismatch of their reported and genetically inferred sex ( $N=378$ ), putative aneuploidy ( $N=652$ ), excessively high genomewide heterozygosity ( $> 0.19$ ) or genotype missingness (missing rate  $> 0.05$ ) ( $N=986$ ), and we also restricted the analysis to participants with British ancestry as used by Bycroft et al (Bycroft et al., 2017). After this genetic quality control,

there were a maximum of 335,998 participants per variable (see table S5 for sample sizes per variable).

We then performed genome-wide association scanning (GWAS) separately for handedness, birthweight, and being breastfed, using the program BOLT-LMM which uses linear mixed effects regression under an additive genetic model, (v2.3)(Loh et al., 2015) and using the Haplotype Reference Consortium (HRC) imputed genotype dosages (39,131,578 SNPs) (Haplotype Reference Consortium, 2016). The top ten principal components capturing genetic diversity in the genome-wide genotype data, calculated using fastPCA (Galinsky et al., 2016) and provided by the UKB (Bycroft et al., 2017), were included as covariates to control for population structure, as well as sex, age, genotyping array, and assessment centre. For each SNP this generated summary association statistics with the trait of interest, including regression betas, P values, and allelic directions of effect. These were then used as input for LD Score Regression (LDSC, v.1.0.0) (Bulik-Sullivan et al., 2015; Finucane et al., 2015), to estimate SNP-based heritability for each trait and perform genetic correlation analysis. For the binary traits handedness and being breastfed, the population and sample prevalence were assumed to be the same, to obtain estimates in the liability scale. Pre-computed linkage disequilibrium (LD) scores based on 1000 Genomes European-descent data (<https://data.broadinstitute.org/alkesgroup/LDSCORE/>) were used. The analysis was restricted to SNPs with minor allele frequencies greater than 0.01 in the specific set of subjects having non-missing data for the trait being assessed, as well as imputation quality scores >0.9 (i.e. INFO scores from the imputation package IMPUTE(Howie et al., 2009)), and which were present in the reference panel for LD Scores. The final number of genome-wide SNPs ranged from 1,174,271-1,174,276, depending on which trait (for SNP-based heritability) or trait pair (for genetic correlation) was being analysed.

Power analyses for assessing genetic correlations between handedness and the two other traits (i.e. birthweight and being breastfed) were performed using the GCTA-GREML power calculator (Visscher et al., 2014), considering the relevant sample sizes, SNP-based heritabilities and trait prevalences. Since LD score regression utilises GWAS summary statistics while GCTA relies on individual genotype data, the power is likely to be slightly lower for the former; however, the GCTA-GREML power calculator gives an indicative estimate. Results of the power analysis are shown in Figure S7.

## Results

### *Associations between variables*

In univariable analyses, a higher probability of being left-handed was associated with being male, being part of a multiple birth, not being breastfed, having lower birthweight, being born in a more recent year, and being born in summer (all p-values < 0.05; Table 3 for categorical variables, Table 4 for continuous variables). The association of year of birth and left-handedness in Figure S2, birthweight and left-handedness is shown in Figure S3, and month of birth and left-handedness in Figure S4. The different countries within the UK also differed in rates of left-handers, with Wales having the lowest proportion, and people who were born outside the UK even lower (Table 3).

In separate univariable analyses of males and females (Table S1 and S2), the cosine function of month of birth only had an effect in females (Figure S4,  $p=0.388$  in males,  $p=5.6e-05$  in females).

*Table 3 Univariable analysis of categorical early life variables and handedness. OR refers to the odds ratio, CI to the confidence interval.*

| TRAIT | N | P | Frequency of left-handedness | Notes | OR for right-handedness (95% |
|-------|---|---|------------------------------|-------|------------------------------|
|-------|---|---|------------------------------|-------|------------------------------|

|                        |         |          |                                        |                                                                   | CI)               |
|------------------------|---------|----------|----------------------------------------|-------------------------------------------------------------------|-------------------|
| Sex (male)             | 421,667 | 2.0E-113 | females = 8.6%,<br>males = 10.6%       | 46% males                                                         | 0.79 (0.77-0.80)  |
| Part of multiple birth | 414,560 | 5.9E-08  | single = 9.5%,<br>multiple=11.2%       | 2.2% of participants are from multiple birth                      | 0.83 (0.78-0.89)  |
| Maternal smoking       | 363,866 | 0.102    | non-smoking=9.4%;<br>smoking=9.6%      | 29% of mothers smoked around pregnancy                            | 0.99 (0.99- 1.00) |
| Breastfeeding          | 322,576 | 1.55E-26 | breastfed=9.1%,<br>not breastfed=10.3% | 72% of participants were breastfed                                | 1.15 (1.12-1.18)  |
| Country of origin      | 420,939 | 1.4E-150 |                                        | Lowest frequency left-handers born outside UK, highest in England |                   |
| England                | 322,287 |          | 10.1%                                  |                                                                   |                   |
| N. Ireland             | 2,899   |          | 8.8%                                   |                                                                   |                   |
| Scotland               | 34,424  |          | 8.1%                                   |                                                                   |                   |
| Wales                  | 18,370  |          | 7.3%                                   |                                                                   |                   |
| Rep. of Ireland        | 4,801   |          | 7.3%                                   |                                                                   |                   |
| Elsewhere              | 38,158  |          | 6.8%                                   |                                                                   |                   |

In the multivariable model including both sexes, the probability of being left-handed was influenced by sex, year of birth, birthweight, country of birth, multiple birth, breastfeeding and the cosine function of month of birth (all  $p < 0.05$ ) (Table 5). As the model fitting involved simultaneous entry, the significance of each of these variables indicates an independent effect after accounting for all others. All variables together significantly explained variation in handedness ( $p = 2E-127$ ), but the explained variance was very low (pseudo  $R^2$  MacFadden = 0.005).

Table 4 Univariable analysis of continuous early life variables and handedness

| TRAIT         | N       | p-value | Note                                        | Effect on logit Right Handedness |
|---------------|---------|---------|---------------------------------------------|----------------------------------|
| Year of birth | 421,667 | 1.0E-30 | Increase ~ 0.7percentage -points per decade | -0.007yr <sup>-1</sup>           |
| Birthweight   | 231,155 | 0.0009  | Left-handers are ~26g lighter on average    | 0.035kg <sup>-1</sup>            |
| Cosine(month) | 421,667 | 0.004   | See Figure S4                               | 0.011                            |

Although tests for variance inflation showed that there was no distorting collinearity in the model, with all inflation factors below 1.2, most predictor variables were correlated or associated with each other to a degree in pairwise univariable testing (see Figure 1). For example, those from multiple births reported being born considerably lighter than singletons (2.46 kg vs 3.36 kg,  $p < 2.2e-16$ ), while breastfed children were born heavier than non-breastfed children (3.39 kg vs 3.25 kg,  $p < 2.2e-16$ ). In fact, birthweight was associated with all of the other variables (Figure 1), apart from the year of birth ( $p = 0.75$ , Figure S5). As regards birthweight and month of the year, the heaviest children were born in September-October (Figure S6). Children from smoking mothers were born a little lighter than from non-smoking mothers (3.28 kg vs 3.37 kg,  $p < 2.2e-16$ ). Males were heavier on average than females



at birth (3.45 kg vs 3.25 kg,  $p < 2.2 \times 10^{-16}$ ), but still males showed a higher probability of left-handedness than females in the multivariable model, i.e. opposite in direction to the association of birthweight and handedness. Also sex was associated with a number of the other variables (Figure 1). Year of birth was not correlated with birthweight, but was associated with most of the maternal behavioural traits (Figure 1).

|                  | year of birth | birth-weight | twin   | breastfed | maternal smoking | month. cosine | sex   | UK country |
|------------------|---------------|--------------|--------|-----------|------------------|---------------|-------|------------|
| year of birth    |               |              |        |           |                  |               |       |            |
| birth-weight     | 0.003         |              |        |           |                  |               |       |            |
| twin             | -0.012        | -0.213       |        |           |                  |               |       |            |
| breastfed        | -0.180        | 0.093        | -0.050 |           |                  |               |       |            |
| maternal smoking | 0.013         | -0.067       | 0.000  | -0.090    |                  |               |       |            |
| month.cos        | 0.011         | -0.021       | -0.001 | -0.011    | 0.002            |               |       |            |
| sex (male)       | 0.006         | 0.148        | -0.007 | 0.040     | -0.011           | -0.002        |       |            |
| UK country       | 0.075         | 0.019        | 0.011  | 0.094     | 0.070            | 0.001         | 0.027 |            |

Figure 1 Associations between predictor variables. For associations between categorical variables, Cramer's V is presented. Associations between continuous variables are shown as Pearson R. Associations between binary categorical and continuous variables are shown as Spearman rho. Associations between multi-category variable UK Country and continuous variables are shown as the ANOVA adjusted R. Colour and sign show the direction of the association between two binary variables, between two continuous variables or between binary and continuous variables (orange positive, green negative). Grey font indicates non-significant associations ( $p > 0.001$ ).

Despite the associations between the predictors, all predictors had independent effects on handedness in the multivariable model (Table 5). In the multivariable models that were fitted separately for males and females, again all included predictor variables were significant at  $p < 0.05$  (Tables S3 and S4), although month of birth and year-squared were not included in the model for males, as these were not significant in univariable testing in males only ( $P > 0.05$ ).

Table 5 Multivariable logistic model for right-handedness, all participants

|                    | Estimate | S.E.  | z      | P       | OR   | OR 2.5% | OR 97.5% |
|--------------------|----------|-------|--------|---------|------|---------|----------|
| (Intercept)        | 15.4     | 1.78  | 8.67   | 2.1E-18 |      |         |          |
| <b>Categorical</b> |          |       |        |         |      |         |          |
| Sex (Male)         | -0.238   | 0.015 | -16.06 | 2.5E-58 | 0.79 | 0.77    | 0.81     |
| twin (Yes)         | -0.141   | 0.044 | -3.238 | 0.0012  | 0.87 | 0.80    | 0.95     |
| breastfed (Yes)    | 0.105    | 0.016 | 6.560  | 5.4E-11 | 1.11 | 1.08    | 1.15     |
| UKcountry-Ireland* | 0.238    | 0.095 | 2.496  | 0.013   | 1.27 | 1.06    | 1.54     |
| UKcountry-NI       | 0.183    | 0.099 | 1.850  | 0.064   | 1.20 | 0.99    | 1.47     |
| UKcountry-Scotland | 0.250    | 0.029 | 8.699  | 1.7E-18 | 1.28 | 1.21    | 1.36     |
| UKcountry-Wales    | 0.414    | 0.044 | 10.43  | 9.0E-26 | 1.51 | 1.40    | 1.64     |

|                                |             |       |        |         |      |      |      |
|--------------------------------|-------------|-------|--------|---------|------|------|------|
| UKcountry-<br>Elsewhere        | 0.321       | 0.033 | 9.585  | 4.6E-22 | 1.38 | 1.29 | 1.47 |
| <b>Continuous</b>              |             |       |        |         |      |      |      |
| year                           | -0.007      | 0.001 | -7.046 | 1.8E-12 |      |      |      |
| year^2 (scaled)                | 6.798       | 3.497 | 1.988  | 0.048   |      |      |      |
| birthweight                    | 0.046       | 0.012 | 3.952  | 7.7E-05 |      |      |      |
| month.cos                      | 0.033       | 0.010 | 3.312  | 0.0009  |      |      |      |
| <b>Model information</b>       |             |       |        |         |      |      |      |
| McFadden pseudo R <sup>2</sup> | 0.005       |       |        |         |      |      |      |
| Log likelihood vs null         | P= 1.1E-139 |       |        |         |      |      |      |
| Hosmer Lemeshow<br>test        | P=0.10      |       |        |         |      |      |      |
| N                              | 219,99      |       |        |         |      |      |      |
|                                | 4           |       |        |         |      |      |      |
| * vs England                   |             |       |        |         |      |      |      |

### *Heritability and genetic correlation*

Consistent with a previous analysis of the UKBiobank dataset (Sudlow et al., 2015), we found low but significant SNP-based heritabilities of left-handedness (3.38%), birthweight (9.34%), and being breastfed (4.07%) (see supplementary table S5). The analysis of genetic correlation between these measures was novel to the current study (Figure S8). The genetic correlation between birthweight and handedness was 0.1059 (s.e.=0.052, p=0.043), indicating a shared genetic contribution to higher birthweight and left-handedness, i.e. in the opposite direction to the phenotypic correlation between these two traits. There was no significant genetic correlation between handedness and being breastfed (Table S6; although note that we had limited power to detect a genetic correlation below 0.3 between handedness and this binary trait (Figure S7)).

## Discussion

### *General observations*

In this study we assessed various early life factors in relation to the probability of becoming left-handed. The large and well characterized dataset provided by the UK Biobank allowed the detection of very subtle associations, as well as the power to test for residual effects of the individual factors after correction for all others. We confirmed a number of previously reported early life factors that influence handedness, which we discuss in detail further below. Being male was associated with left-handedness, as has been widely reported and discussed before (see Introduction)(Gilbert and Wysocki, 1992; Papadatou-Pastou et al., 2008). In addition, we confirmed a very low heritability for left-handedness, but found a novel, putative genetic correlation with birthweight.

However, perhaps the most striking finding from our study is that, even when taken all together, the studied factors had only a tiny overall effect on handedness. The biological basis of left-handedness therefore remains largely unexplained. It remains possible that some major, early life influences on handedness do exist, but which were not assessed in the UK Biobank dataset, and do not correlate strongly with any of the early life variables that were available. However, other possibilities are also plausible, which are not necessarily mutually exclusive. Firstly, handedness might be influenced by an accumulation of many, very small environmental influences, possibly having an effect during prenatal stages. What such environmental effects may be is currently unknown. Secondly, heterogeneous and rare genetic mutations may also be involved (Armour et al., 2014; Kavaklioglu et al., 2016), whose

effects are not well captured by measures of SNP-based heritability, as the latter approach is focussed primarily on more common genetic variation (Vinkhuyzen et al., 2013).

A random model of early embryonic development is also compatible with our observations. For example, if the brain's left-right asymmetry arises from only a subtle left-right bias in the early embryo, such as a gene expression gradient that has a lateralized mean across embryos, but a variance that spans the point of symmetry, then a minority of embryos would experience a reversal of the foundational cues for left-right brain patterning. Subsequent steps in development might then reinforce upon the original cue, and result in the bimodal trait of hand preference in adults. Assuming that hand dominance and/or division of labour between the hands is beneficial for fine motor control, then the fact that we have two hands essentially imposes a binary choice on a developmental program which may be more continuous in its original nature. The fact that human brain embryonic gene expression has been shown to be only very subtly lateralized is consistent with such a model (de Kovel et al., 2018; Ocklenburg et al., 2017).

### *Environmental effects*

Notwithstanding the subtle associations of predictor variables with handedness that we found, some of these associations are consistent with the previous literature and relevant to remark on. Year and country of birth were among the strongest effects. The proportion of left-handers increased almost linearly with year of birth up to 1970, i.e. the birth year of the youngest participants, with  $\sim 0.7$  percentage-points per decade (Figure S2). We attribute this to a decline in enforcing right-handedness, as has been discussed before (Cerhan et al., 1994; Harris, 1993; Salive et al., 1993), rather than reduced survival of non-right-handers (Coren and Halpern, 1991). However, as noted above, it is also possible that unknown environmental influences are involved in handedness, especially prenatally, which might have changed over the decades.

As regards country of birth, while the average proportion of left-handers among people born outside the UK was 6.8%, it was 10.1% in England, and intermediate in the other UK countries. These differences between countries are likely to reflect mainly cultural effects. For example, forced hand switching during childhood may have been more prevalent outside of England, or may have continued for longer.

An effect of the cosine-transformed month of birth on hand preference was found in women, such that left-handedness was associated with being born in the summer. The effect of season of birth on hand preference has been unclear in the literature. In a number of studies, a stronger seasonal effect was found in males than in females (Badian, 1983; Stoyanov et al., 2011). In other studies, more left-handers were found among children born in March-July (Jones and Martin, 2008; Martin and Jones, 1999; Rogerson, 1994), but in other studies in winter (Badian, 1983; Stoyanov et al., 2011; Tran et al., 2014). In yet other studies, no effect of season was detected (Abel and Kruger, 2004; Cosenza and Mingoti, 1995; Karev, 2008; Tonetti et al., 2012). In the UK biobank, we observed that birthweight varied with season, with a pattern that was similar in males and females: the highest average birthweight was in September-October and lowest in February (Figure S6) (Day et al., 2015). However, in the multivariable model we tested for a residual effect of the month of birth after correction for birthweight, and month of birth in females remained significant. Given the conflicting results across various studies, and the subtle and sex-limited effect reported here, this putative effect on hand preference remains tentative.

### *Additional early life factors*

We confirmed that having a higher birthweight, not being part of a multiple birth, and being breastfed, all increase the probability of being right-handed, consistent with previous literature (see

Introduction). Birthweight is a complex trait which reflects not only healthy variation but also non-optimal development or pathology. Insofar as lower birthweight was associated with left-handedness, this suggests that a minority of left-handers may be linked etiologically to developmental insults, as has been discussed elsewhere (Bailey and McKeever, 2004; Gutteling et al., 2007; Nicholls et al., 2012). As regards multiple birth, in a previous study, the effect of twinning was no longer detectable after accounting for the effects of birthweight and APGAR (**A**ppearance, **P**ulse, **G**rimace, **A**ctivity, **R**espiration) score (Heikkila et al., 2015). We saw a significant effect of multiple birth on handedness after correction for birthweight, but the UK Biobank includes no APGAR scores, so we could not assess the relevance of this additional variable. Note also that the UK Biobank variable 'Part of a multiple birth' makes no distinction between twins, triplets, quadruplets etc., although the large majority are expected to be twins.

Interestingly, the postnatal behaviour of breastfeeding was associated with right-handedness and was also positively associated with birthweight: non-breastfed children were lighter at birth. The probability that mothers breastfeed their children may, among other things (Colombo et al., 2018), be associated with mother or baby health, which in turn may be partly reflected in birthweight. Even after accounting for birthweight, a significant association of breastfeeding with right-handedness remained, as has been found before (Denny, 2011). Whether this is due to an underlying prenatal factor that affects both handedness and breastfeeding, or a post-natal behavioural effect, cannot be inferred from the UK Biobank data.

With regard to maternal smoking around the time of birth, we found that this was not significantly associated with left-handedness. An effect of maternal smoking on handedness had been reported suggestively before (Dragovic et al., 2013), but not found consistently in all studies (Olsen, 1995).

In addition to the factors investigated in this study, other early life factors have been reported in the literature, including birth order (Badian, 1983; Bakan, 1971, 1977; Hicks et al., 1978), prenatal testosterone exposure (Elkadi et al., 1999; Lust et al., 2011; Vuoksimaa et al., 2010), maternal age (Badian, 1983; Coren and Porac, 1980; Karev, 2008; McKeever et al., 1995), maternal stress during pregnancy (Reissland et al., 2015; Searleman et al., 1989), and birth events such as caesarean delivery or prolonged labour (Bailey and McKeever, 2004; Nicholls et al., 2012; Van der Elst et al., 2011). Though not all studies have found significant effects of these variables, a general interpretation of the literature is that less benign conditions are associated with higher proportions of left-handedness. Some of these factors may partly influence handedness through effects via birthweight. For example, second and third births were reported to result more often in right-handed children than first births, and births subsequent to third (Badian, 1983; Bakan, 1977; McKeever et al., 1995), while more left-handers were reportedly born to relatively young mothers or older mothers, than to mothers of intermediate age (Domellof et al., 2011; McKeever et al., 1995). Birthweight first increases with maternal age and subsequently decreases (Restrepo-Méndez et al., 2015; Swamy et al., 2012), and low-weight children and preterm births are more common among young (< 20) and older (> 30) mothers than mothers aged in-between (Fall et al., 2015; Restrepo-Méndez et al., 2015). Birth order necessarily correlates with maternal age, with births two and three occurring more often in the intermediate age range. However, birthweight has been shown to vary with birth order even after correction for maternal age (Dahly and Adair, 2010; Swamy et al., 2012). Unfortunately, information on maternal age and birth order were not available for the UK Biobank dataset.

### *Heritability and genetic correlation*

We observed a weak SNP-based heritability for left-handedness (3.4%) which was consistent with previous reports, and also a tentative genetic correlation between handedness and birthweight

(0.11). Paradoxically, the genetic correlation indicated a shared genetic contribution to left-handedness and higher birthweight, which is opposite in direction to the overall phenotypic correlation, i.e. by which right-handedness is associated with increased birthweight. A recent study that characterized correlations across hundreds of traits within the UK biobank (not including the pair handedness -birthweight) reported that genetic and environmental correlations had opposite signs for 29% of non-binary traits (Canela-Xandri et al., 2017). Such patterns may arise, for example, if shared genetic effects on two traits are opposed by common prenatal environmental factors. However, given the subtlety of the heritability and genetic correlation that we found, and that the genetic correlation was only just nominally significant at  $p=0.04$ , we remain cautious about the genetic correlation. It should also be noted that geographic structure might not be fully controlled when using principal components derived from genotype data (Haworth et al., 2018).

It is well established that SNP-based heritability can only capture a proportion of total heritability, that which is caused by common polymorphisms tagged on genotyping arrays (Vinkhuyzen et al., 2013). In large twin studies, the heritability of handedness was higher, around 20-25% (Medland et al., 2009; Suzuki and Ando, 2014; Vuoksimaa et al., 2009). The same was the case for birthweight, which had a twin heritability ~25% or higher (Clausson et al., 2000; Magnus et al., 2001).

### *Limitations*

The UK Biobank participants are older than the general population (birth years between 1934 and 1971), so that some effects in this cohort may be quantitatively or qualitatively different in younger cohorts (Fry et al., 2017). The UK Biobank cohort, ranging over 30 years in age differences, and collected cross-population, is also more heterogeneous than some other previously investigated cohorts for handedness. This may make our results broadly applicable to the general population, but on the other hand, it may mean that some effects were obscured by variation in factors that were not accounted for.

All variables, except sex and year of birth, were self-reported. This may introduce inaccuracies as recall may be imperfect. Also, it is possible that cultural differences affect recall, for example between geographical regions, different ages, or between the sexes. This may have reduced the estimates of effects of early life factors on handedness, compared to if they had been recorded from direct observation.

The present study treated handedness as a categorical trait, which is supported by the bimodal distribution of overall hand preference when compiled across a number of tasks, and its robust test-retest repeatability (McManus, 1991; Ransil and Schachter, 1994; Tan, 1993). However, some aspects of handedness might be more accurately defined by degree and not category.

We allowed for possible non-linear effects of continuous predictor variables in our analyses, but did not include interaction terms between predictors in our multivariable models, in order to avoid collinearity, overfitting, and very extensive multiple testing. As regards sex, we performed some analyses separately within the two sexes to allow for potentially different effects, and we presented some descriptive comparisons between the sexes, but again did not test formally for interaction effects that involve sex. The male and female cohorts differed in a number of respects. For example, the proportion of males was not constant across the years of birth (Figure S1), while women more often than men originated from the Republic of Ireland or elsewhere outside of the UK (Tables S1 and S2), and a much larger proportion of women than men reported their birthweight. Future hypothesis-driven work may investigate specific potential interactions of the various factors studied here.

## *Manuscript information*

### *Disclosure statement*

The authors declare no competing interests.

### *Ethics statement*

This study utilized deidentified data from the baseline assessment of the UK Biobank, a prospective cohort study of 500,000 individuals (age 40–69 years) recruited across Great Britain during 2006–2010 (Sudlow et al., 2015). The protocol and consent were approved by the UK Biobank's Research Ethics Committee.

### *Author contributions*

CGFdK: Conceptualization, Formal Analysis, Methodology, Visualization, Writing – Original Draft Preparation. ACC: Data Curation, Formal Analysis, Writing – Original Draft Preparation. CF: Conceptualization, Funding Acquisition, Project Administration, Supervision, Writing – Review & Editing

### *Funding*

CGFdK was supported by an Open Programme grant (824.14.005) to CF from the Netherlands Organization for Scientific Research (NWO). ACC was funded by a grant to CF from the NWO (054-15-101) as part of the FLAG-ERA consortium project 'MULTI-LATERAL', a Partner Project to the European Union's Flagship Human Brain Project. Additional support was from the Max Planck Society (Germany).

## References

- Abel, E.L., Kruger, M.L., 2004. Relation of handedness with season of birth of professional baseball players revisited. *Perceptual and motor skills* 98, 44-46. doi: 10.2466/pms.98.1.44-46
- Armour, J.A., Davison, A., McManus, I.C., 2014. Genome-wide association study of handedness excludes simple genetic models. *Heredity (Edinb)* 112, 221-225. doi: 10.1038/hdy.2013.93
- Badian, N.A., 1983. Birth order, maternal age, season of birth, and handedness. *Cortex* 19, 451-463. doi:
- Bailey, L.M., McKeever, W.F., 2004. A large-scale study of handedness and pregnancy/birth risk events: implications for genetic theories of handedness. *Laterality* 9, 175-188. doi: 10.1080/13576500342000013
- Bakan, P., 1971. Handedness and birth order. *Nature* 229, 195. doi:
- Bakan, P., 1977. Left handedness and birth order revisited. *Neuropsychologia* 15, 837-839. doi:
- Bulik-Sullivan, B.K., Loh, P.R., Finucane, H.K., Ripke, S., Yang, J., Schizophrenia Working Group of the Psychiatric Genomics, C., Patterson, N., Daly, M.J., Price, A.L., Neale, B.M., 2015. LD Score regression distinguishes confounding from polygenicity in genome-wide association studies. *Nat Genet* 47, 291-295. doi: 10.1038/ng.3211
- Bycroft, C., Freeman, C., Petkova, D., Band, G., Elliott, L.T., Sharp, K., Motyer, A., Vukcevic, D., Delaneau, O., O'Connell, J., Cortes, A., Welsh, S., McVean, G., Leslie, S., Donnelly, P., Marchini, J., 2017. Genome-wide genetic data on ~500,000 UK Biobank participants. bioRxiv. doi: 10.1101/166298
- Canela-Xandri, O., Rawlik, K., Tenesa, A., 2017. An atlas of genetic associations in UK Biobank. bioRxiv. doi: 10.1101/176834
- Cerhan, J.R., Folsom, A.R., Potter, J.D., Prineas, R.J., 1994. Handedness and mortality risk in older women. *American journal of epidemiology* 140, 368-374. doi:
- Clausson, B., Lichtenstein, P., Cnattingius, S., 2000. Genetic influence on birthweight and gestational length determined by studies in offspring of twins. *BJOG : an international journal of obstetrics and gynaecology* 107, 375-381. doi:
- Colombo, L., Crippa, B.L., Consonni, D., Bettinelli, M.E., Agosti, V., Mangino, G., Bezze, E.N., Mauri, P.A., Zanotta, L., Roggero, P., Plevani, L., Bertoli, D., Gianni, M.L., Mosca, F., 2018. Breastfeeding Determinants in Healthy Term Newborns. *Nutrients* 10. doi: 10.3390/nu10010048
- Coren, S., Halpern, D.F., 1991. Left-handedness: a marker for decreased survival fitness. *Psychol Bull* 109, 90-106. doi:
- Coren, S., Porac, C., 1980. Birth factors and laterality: effects of birth order, parental age, and birth stress on four indices of lateral preference. *Behav Genet* 10, 123-138. doi:
- Cosenza, R.M., Mingoti, S.A., 1995. Season of birth and handedness revisited. *Perceptual and motor skills* 81, 475-480. doi: 10.2466/pms.1995.81.2.475
- Dahly, D.L., Adair, L.S., 2010. Does lower birth order amplify the association between high socio-economic status and central adiposity in young adult Filipino males? *International journal of obesity (2005)* 34, 751-759. doi: 10.1038/ijo.2009.275
- Davis, A., Annett, M., 1994. Handedness as a function of twinning, age and sex. *Cortex* 30, 105-111. doi:
- Day, F.R., Forouhi, N.G., Ong, K.K., Perry, J.R.B., 2015. Season of birth is associated with birth weight, pubertal timing, adult body size and educational attainment: a UK Biobank study. *Heliyon* 1, e00031. doi: <https://doi.org/10.1016/j.heliyon.2015.e00031>
- de Kovel, C.G.F., Lisgo, S., Karlebach, G., Ju, J., Cheng, G., Fisher, S.E., Francks, C., 2017. Left-Right Asymmetry of Maturation Rates in Human Embryonic Neural Development. *Biol Psychiatry* 82, 204-212. doi: 10.1016/j.biopsych.2017.01.016
- de Kovel, C.G.F., Lisgo, S.N., Fisher, S.E., Francks, C., 2018. Subtle left-right asymmetry of gene expression profiles in embryonic and foetal human brains. *Sci Rep-Uk* submitted. doi:
- Deep-Soboslay, A., Hyde, T.M., Callicott, J.P., Lener, M.S., Verchinski, B.A., Apud, J.A., Weinberger, D.R., Elvevag, B., 2010. Handedness, heritability, neurocognition and brain asymmetry in schizophrenia. *Brain : a journal of neurology* 133, 3113-3122. doi: 10.1093/brain/awq160

- Denny, K., 2012. Breastfeeding predicts handedness. *Laterality* 17, 361-368. doi: 10.1080/1357650x.2011.579131
- Domellof, E., Johansson, A.M., Ronnqvist, L., 2011. Handedness in preterm born children: a systematic review and a meta-analysis. *Neuropsychologia* 49, 2299-2310. doi: 10.1016/j.neuropsychologia.2011.04.033
- Dragovic, M., Milenkovic, S., Kocijancic, D., Zlatko, S., 2013. Etiological aspect of left-handedness in adolescents. *Srpski arhiv za celokupno lekarstvo* 141, 354-358. doi:
- Elkadi, S., Nicholls, M.E., Clode, D., 1999. Handedness in opposite and same-sex dizygotic twins: testing the testosterone hypothesis. *Neuroreport* 10, 333-336. doi:
- Ellis, S.J., Ellis, P.J., Marshall, E., 1988. Hand preference in a normal population. *Cortex* 24, 157-163. doi:
- Fall, C.H., Sachdev, H.S., Osmond, C., Restrepo-Mendez, M.C., Victora, C., Martorell, R., Stein, A.D., Sinha, S., Tandon, N., Adair, L., Bas, I., Norris, S., Richter, L.M., 2015. Association between maternal age at childbirth and child and adult outcomes in the offspring: a prospective study in five low-income and middle-income countries (COHORTS collaboration). *The Lancet. Global health* 3, e366-377. doi: 10.1016/s2214-109x(15)00038-8
- Finucane, H.K., Bulik-Sullivan, B., Gusev, A., Trynka, G., Reshef, Y., Loh, P.-R., Anttila, V., Xu, H., Zang, C., Farh, K., Ripke, S., Day, F.R., Consortium, R., Schizophrenia Working Group of the Psychiatric Genomics, C., The, R.C., Purcell, S., Stahl, E., Lindstrom, S., Perry, J.R.B., Okada, Y., Raychaudhuri, S., Daly, M., Patterson, N., Neale, B.M., Price, A.L., 2015. Partitioning heritability by functional annotation using genome-wide association summary statistics. *Nature genetics* 47, 1228-1235. doi: 10.1038/ng.3404
- Francks, C., 2015. Exploring human brain lateralization with molecular genetics and genomics. *Annals of the New York Academy of Sciences* 1359, 1-13. doi: 10.1111/nyas.12770
- Fry, A., Littlejohns, T.J., Sudlow, C., Doherty, N., Adamska, L., Sprosen, T., Collins, R., Allen, N.E., 2017. Comparison of Sociodemographic and Health-Related Characteristics of UK Biobank Participants With Those of the General Population. *American journal of epidemiology* 186, 1026-1034. doi: 10.1093/aje/kwx246
- Galinsky, K.J., Bhatia, G., Loh, P.R., Georgiev, S., Mukherjee, S., Patterson, N.J., Price, A.L., 2016. Fast Principal-Component Analysis Reveals Convergent Evolution of ADH1B in Europe and East Asia. *American journal of human genetics* 98, 456-472. doi: 10.1016/j.ajhg.2015.12.022
- Galobardes, B., Bernstein, M.S., Morabia, A., 1999. The association between switching hand preference and the declining prevalence of left-handedness with age. *Am J Public Health* 89, 1873-1875. doi:
- Ge, T., Chen, C.Y., Neale, B.M., Sabuncu, M.R., Smoller, J.W., 2017. Phenome-wide heritability analysis of the UK Biobank. *PLoS Genet* 13, e1006711. doi: 10.1371/journal.pgen.1006711
- Gilbert, A.N., Wysocki, C.J., 1992. Hand preference and age in the United States. *Neuropsychologia* 30, 601-608. doi:
- Guadalupe, T., Willems, R.M., Zwiers, M.P., Arias Vasquez, A., Hoogman, M., Hagoort, P., Fernandez, G., Buitelaar, J., Franke, B., Fisher, S.E., Francks, C., 2014. Differences in cerebral cortical anatomy of left- and right-handers. *Front Psychol* 5, 261. doi: 10.3389/fpsyg.2014.00261
- Gutteling, B.M., de Weerth, C., Buitelaar, J.K., 2007. Prenatal stress and mixed-handedness. *Pediatric research* 62, 586-590. doi: 10.1203/PDR.0b013e3181558678
- Haplotype Reference Consortium, t., 2016. A reference panel of 64,976 haplotypes for genotype imputation. *Nature Genetics* 48, 1279. doi: 10.1038/ng.3643
- Harris, L.J., 1993. Do left-handers die sooner than right-handers? Commentary on Coren and Halpern's (1991) "Left-handedness: a marker for decreased survival fitness". *Psychol Bull* 114, 203-234; discussion 235-247. doi:
- Haworth, S., Mitchell, R., Corbin, L., Wade, K.H., Dudding, T., Budu-Aggrey, A., Carslake, D., Hemani, G., Paternoster, L., Davey Smith, G., Davies, N., Lawson, D., Timpson, N., 2018. Common genetic variants and health outcomes appear geographically structured in the UK Biobank sample: Old concerns returning and their implications. *bioRxiv*. doi: 10.1101/294876
- Hay, D.A., Howie, P.M., 1980. Handedness and differences in birthweight of twins. *Perceptual and motor skills* 51, 666. doi: 10.2466/pms.1980.51.2.666



- Heikkila, K., Vuoksima, E., Saari-Kemppainen, A., Kaprio, J., Rose, R.J., Haukka, J., Pitkaniemi, J., Iivanainen, M., 2015. Higher Prevalence of Left-Handedness in Twins? Not After Controlling Birth Time Confounders. *Twin Res Hum Genet* 18, 526-532. doi: 10.1017/thg.2015.53
- Hepper, P.G., 2013. The developmental origins of laterality: Fetal handedness. *Developmental Psychobiology* 55, 588-595. doi: 10.1002/dev.21119
- Hepper, P.G., Shahidullah, S., White, R., 1991. Handedness in the human fetus. *Neuropsychologia* 29, 1107-1111. doi:
- Hicks, R.A., Evans, E.A., Pellegrini, R.J., 1978. Correlation between handedness and birth order: compilation of five studies. *Perceptual and motor skills* 46, 53-54. doi: 10.2466/pms.1978.46.1.53
- Howie, B.N., Donnelly, P., Marchini, J., 2009. A flexible and accurate genotype imputation method for the next generation of genome-wide association studies. *PLoS Genet* 5, e1000529. doi: 10.1371/journal.pgen.1000529
- Jones, G.V., Martin, M., 2008. Seasonal anisotropy in handedness. *Cortex* 44, 8-12. doi: <https://doi.org/10.1016/j.cortex.2006.05.001>
- Karev, G.B., 2008. Season of birth and parental age in right, mixed and left handers. *Cortex* 44, 79-81. doi: 10.1016/j.cortex.2006.01.001
- Kavaklioglu, T., Ajmal, M., Hameed, A., Francks, C., 2016. Whole exome sequencing for handedness in a large and highly consanguineous family. *Neuropsychologia* 93, 342-349. doi: 10.1016/j.neuropsychologia.2015.11.010
- Kushner, H.I., 2013. Why are there (almost) no left-handers in China? *Endeavour* 37, 71-81. doi: 10.1016/j.endeavour.2012.12.003
- Lien, Y.J., Chen, W.J., Hsiao, P.C., Tsuang, H.C., 2015. Estimation of heritability for varied indexes of handedness. *Laterality* 20, 469-482. doi: 10.1080/1357650x.2014.1000920
- Loh, P.R., Tucker, G., Bulik-Sullivan, B.K., Vilhjalmsson, B.J., Finucane, H.K., Salem, R.M., Chasman, D.I., Ridker, P.M., Neale, B.M., Berger, B., Patterson, N., Price, A.L., 2015. Efficient Bayesian mixed-model analysis increases association power in large cohorts. *Nat Genet* 47, 284-290. doi: 10.1038/ng.3190
- Lust, J.M., Geuze, R.H., Van de Beek, C., Cohen-Kettenis, P.T., Bouma, A., Groothuis, T.G., 2011. Differential effects of prenatal testosterone on lateralization of handedness and language. *Neuropsychology* 25, 581-589. doi: 10.1037/a0023293
- Lyall, L.M., Wyse, C.A., Celis-Morales, C.A., Lyall, D.M., Cullen, B., Mackay, D., Ward, J., Graham, N., Strawbridge, R.J., Gill, J.M.R., Ferguson, A., Bailey, M.E.S., Pell, J.P., Curtis, A.M., Smith, D.J., 2018. Seasonality of depressive symptoms in women but not in men: A cross-sectional study in the UK Biobank cohort. *J Affect Disord* 229, 296-305. doi: 10.1016/j.jad.2017.12.106
- Magnus, P., Gjessing, H.K., Skrandal, A., Skjaerven, R., 2001. Paternal contribution to birth weight. *J Epidemiol Community Health* 55, 873-877. doi:
- Markou, P., Ahtam, B., Papadatou-Pastou, M., 2017. Elevated Levels of Atypical Handedness in Autism: Meta-Analyses. *Neuropsychol Rev* 27, 258-283. doi: 10.1007/s11065-017-9354-4
- Martin, M., Jones, G.V., 1999. Handedness and season of birth: a gender-invariant relation. *Cortex* 35, 123-128. doi:
- McKeever, W.F., Suter, P.J., Rich, D.A., 1995. Maternal age and parity correlates of handedness: gender, but no parental handedness modulation of effects. *Cortex* 31, 543-553. doi:
- McManus, I.C., 1991. The inheritance of left-handedness. *Ciba Found Symp* 162, 251-267; discussion 267-281. doi:
- Medland, S.E., Duffy, D.L., Wright, M.J., Geffen, G.M., Hay, D.A., Levy, F., van-Beijsterveldt, C.E., Willemsen, G., Townsend, G.C., White, V., Hewitt, A.W., Mackey, D.A., Bailey, J.M., Slutske, W.S., Nyholt, D.R., Treloar, S.A., Martin, N.G., Boomsma, D.I., 2009. Genetic influences on handedness: data from 25,732 Australian and Dutch twin families. *Neuropsychologia* 47, 330-337. doi: 10.1016/j.neuropsychologia.2008.09.005
- Neale, B., 2017a. Heritability of >2,000 traits and disorders in the UK Biobank. doi:
- Neale, B., 2017b. Rapid GWAS of thousands of phenotypes for 337,000 samples in the UK Biobank. doi:
- Nicholls, M.E., Johnston, D.W., Shields, M.A., 2012. Adverse birth factors predict cognitive ability, but not hand preference. *Neuropsychology* 26, 578-587. doi: 10.1037/a0029151

- Ocklenburg, S., Beste, C., Güntürkün, O., 2013. Handedness: A neurogenetic shift of perspective. *Neuroscience & Biobehavioral Reviews* 37, 2788-2793. doi: <https://doi.org/10.1016/j.neubiorev.2013.09.014>
- Ocklenburg, S., Schmitz, J., Moifar, Z., Moser, D., Klose, R., Lor, S., Kunz, G., Tegenthoff, M., Faustmann, P., Francks, C., Epplen, J.T., Kumsta, R., Gunturkun, O., 2017. Epigenetic regulation of lateralized fetal spinal gene expression underlies hemispheric asymmetries. *Elife* 6. doi: 10.7554/eLife.22784
- Olsen, J., 1995. Is left-handedness a sensitive marker of prenatal exposures or indicators of fetal growth? *Scandinavian journal of social medicine* 23, 233-235. doi:
- Papadatou-Pastou, M., Martin, M., Munafo, M.R., Jones, G.V., 2008. Sex differences in left-handedness: a meta-analysis of 144 studies. *Psychol Bull* 134, 677-699. doi: 10.1037/a0012814
- Peters, M., Reimers, S., Manning, J.T., 2006. Hand preference for writing and associations with selected demographic and behavioral variables in 255,100 subjects: The BBC internet study. *Brain and Cognition* 62, 177-189. doi: 10.1016/j.bandc.2006.04.005
- Peterson, J.M., Lansky, L.M., 1977. Left-handedness among architects: partial replication and some new data. *Perceptual and motor skills* 45, 1216-1218. doi: 10.2466/pms.1977.45.3f.1216
- Ransil, B.J., Schachter, S.C., 1994. Test-retest reliability of the Edinburgh Handedness Inventory and Global Handedness preference measurements, and their correlation. *Perceptual and motor skills* 79, 1355-1372. doi: 10.2466/pms.1994.79.3.1355
- Raymond, M., Pontier, D., 2004. Is there geographical variation in human handedness? *Laterality* 9, 35-51. doi: 10.1080/13576500244000274
- Reissland, N., Aydin, E., Francis, B., Exley, K., 2015. Laterality of foetal self-touch in relation to maternal stress. *Laterality* 20, 82-94. doi: 10.1080/1357650x.2014.920339
- Restrepo-Méndez, M.C., Lawlor, D.A., Horta, B.L., Matijasevich, A., Santos, I.S., Menezes, A.M.B., Barros, F.C., Victora, C.G., 2015. The Association of Maternal Age with Birthweight and Gestational Age: A Cross-Cohort Comparison. *Paediatric and Perinatal Epidemiology* 29, 31-40. doi: 10.1111/ppe.12162
- Rogerson, P.A., 1994. On the relationship between handedness and season of birth for men. *Perceptual and motor skills* 79, 499-506. doi: 10.2466/pms.1994.79.1.499
- Salive, M.E., Guralnik, J.M., Glynn, R.J., 1993. Left-handedness and mortality. *American Journal of Public Health* 83, 265-267. doi:
- Sartarelli, M., 2016. Handedness, Earnings, Ability and Personality. Evidence from the Lab. *PLoS One* 11, e0164412. doi: 10.1371/journal.pone.0164412
- Scerri, T.S., Brandler, W.M., Paracchini, S., Morris, A.P., Ring, S.M., Richardson, A.J., Talcott, J.B., Stein, J., Monaco, A.P., 2011. PCSK6 is associated with handedness in individuals with dyslexia. *Hum Mol Genet* 20, 608-614. doi: 10.1093/hmg/ddq475
- Searleman, A., Porac, C., Coren, S., 1989. Relationship between birth order, birth stress, and lateral preferences: a critical review. *Psychol Bull* 105, 397-408. doi:
- Stoyanov, Z., Nikolova, P., Pashalieva, I., 2011. Season of birth, Geschwind and Galaburda hypothesis, and handedness. *Laterality* 16, 607-619. doi: 10.1080/1357650X.2010.506689
- Sudlow, C., Gallacher, J., Allen, N., Beral, V., Burton, P., Danesh, J., Downey, P., Elliott, P., Green, J., Landray, M., Liu, B., Matthews, P., Ong, G., Pell, J., Silman, A., Young, A., Sprosen, T., Peakman, T., Collins, R., 2015. UK biobank: an open access resource for identifying the causes of a wide range of complex diseases of middle and old age. *PLoS medicine* 12, e1001779. doi: 10.1371/journal.pmed.1001779
- Suzuki, K., Ando, J., 2014. Genetic and environmental structure of individual differences in hand, foot, and ear preferences: A twin study. *Laterality: Asymmetries of Body, Brain and Cognition* 19, 113-128. doi: 10.1080/1357650X.2013.790396
- Swamy, G.K., Edwards, S., Gelfand, A., James, S.A., Miranda, M.L., 2012. Maternal age, birth order, and race: differential effects on birthweight. *Journal of Epidemiology and Community Health* 66, 136-142. doi: 10.1136/jech.2009.088567
- Tan, U., 1993. Normal distribution of hand preference and its bimodality. *Int J Neurosci* 68, 61-65. doi:
- Tonetti, L., Adan, A., Caci, H., Fabbri, M., Natale, V., 2012. Season of birth and handedness in young adults. *Laterality* 17, 597-601. doi: 10.1080/1357650x.2011.599118

- Tran, U.S., Stieger, S., Voracek, M., 2014. Latent variable analysis indicates that seasonal anisotropy accounts for the higher prevalence of left-handedness in men. *Cortex* 57, 188-197. doi: 10.1016/j.cortex.2014.04.011
- Van der Elst, W., Hurks, P.P., Wassenberg, R., Meijs, C.J., Van Boxtel, M.P., Jolles, J., 2011. On the association between lateral preferences and pregnancy/birth stress events in a nonclinical sample of school-aged children. *Journal of clinical and experimental neuropsychology* 33, 1-8. doi: 10.1080/13803391003757825
- Vinkhuyzen, A.A., Wray, N.R., Yang, J., Goddard, M.E., Visscher, P.M., 2013. Estimation and partition of heritability in human populations using whole-genome analysis methods. *Annu Rev Genet* 47, 75-95. doi: 10.1146/annurev-genet-111212-133258
- Visscher, P.M., Hemani, G., Vinkhuyzen, A.A., Chen, G.B., Lee, S.H., Wray, N.R., Goddard, M.E., Yang, J., 2014. Statistical power to detect genetic (co)variance of complex traits using SNP data in unrelated samples. *PLoS Genet* 10, e1004269. doi: 10.1371/journal.pgen.1004269
- Vuoksima, E., Eriksson, C.J., Pulkkinen, L., Rose, R.J., Kaprio, J., 2010. Decreased prevalence of left-handedness among females with male co-twins: evidence suggesting prenatal testosterone transfer in humans? *Psychoneuroendocrinology* 35, 1462-1472. doi: 10.1016/j.psyneuen.2010.04.013
- Vuoksima, E., Koskenvuo, M., Rose, R.J., Kaprio, J., 2009. Origins of handedness: A nationwide study of 30161 adults. *Neuropsychologia* 47, 1294-1301. doi: <https://doi.org/10.1016/j.neuropsychologia.2009.01.007>
- Warren, D.M., Stern, M., Duggirala, R., Dyer, T.D., Almasy, L., 2006. Heritability and linkage analysis of hand, foot, and eye preference in Mexican Americans. *Laterality: Asymmetries of Body, Brain and Cognition* 11, 508-524. doi: 10.1080/13576500600761056

### *List of Figures*

Figure 1 Associations between predictor variables

#### *Supplemental*

Supp. Figure 1 Male and female participants by year of birth

Supp. Figure 2 Left-handedness vs year of birth

Supp. Figure 3 Left-handedness vs birthweight in males and females

Supp. Figure 4 Left-handedness vs month of birth

Supp. Figure 5 Birthweight vs year of birth

Supp. Figure 6 Birthweight vs month of birth

Supp. Figure 7. Power analysis for genetic correlation

Supp. Figure 8. Genetic and phenotypic correlations between variables

### *List of Tables*

Table 1 Distribution responses to question about handedness, full data

Table 2 Early life variables included in the analysis

Table 3 Univariable analysis of categorical early life variables and handedness

Table 4 Univariable analysis of continuous early life variables and handedness

Table 5 Multivariable model for right-handedness, all participants

*Supplemental*

Supp. Table 1. Univariable analysis of early life variables and handedness in males

Supp. Table 2. Univariable analysis of early life variables and handedness in females

Supp. Table 3 Multivariable model for right-handedness, male participants

Supp. Table 4 Multivariable model for right-handedness, female participants

Supp. Table 5. Heritability estimates of handedness and covariates of interest

Supp. Table 6. Genetic correlation of handedness with a second trait
